# Supplementary material
Source: Springer Nature journal article supplement (https://www.springermedizin.de/resource/supplementary/12916_2011_494_MOESM2_ESM.pdf/9598168)

### A Fatigue; VAS scale

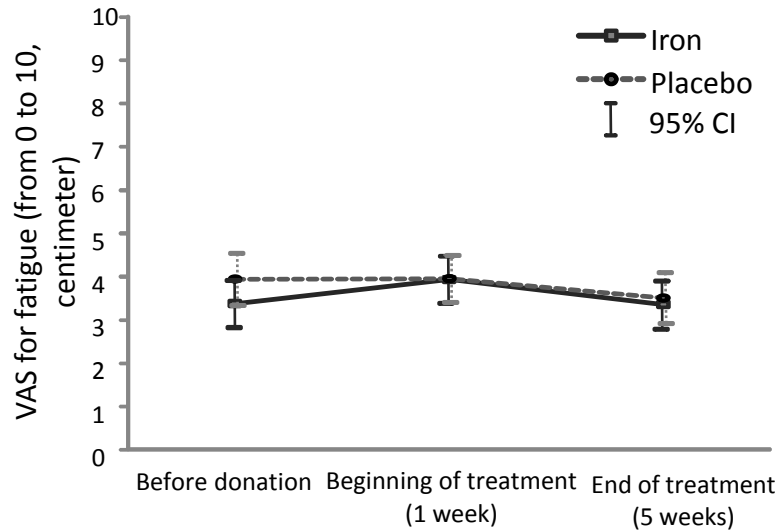

### B Fatigue; FSS score

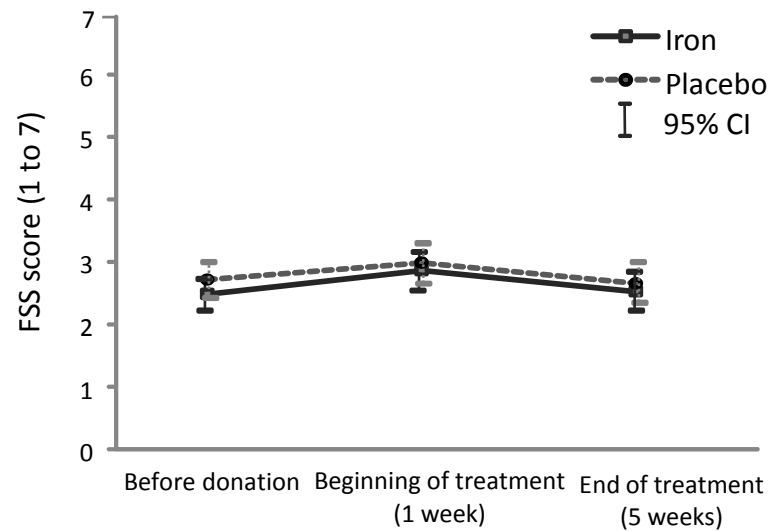

### C Hemoglobin

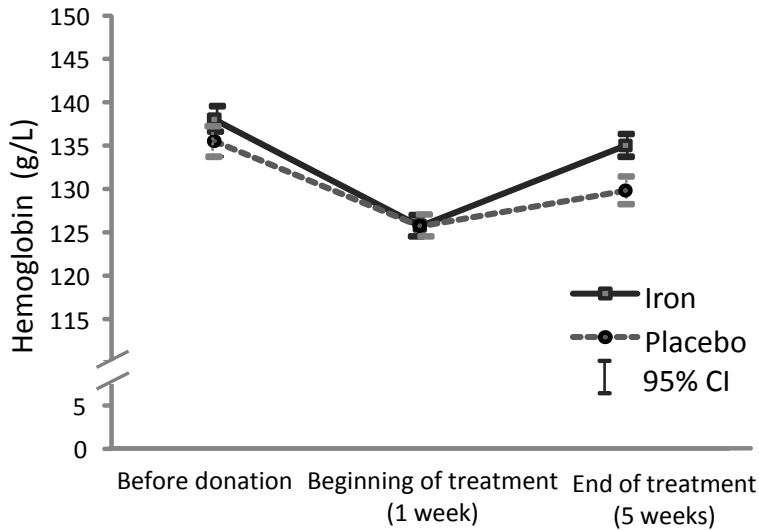

### D Ferritin

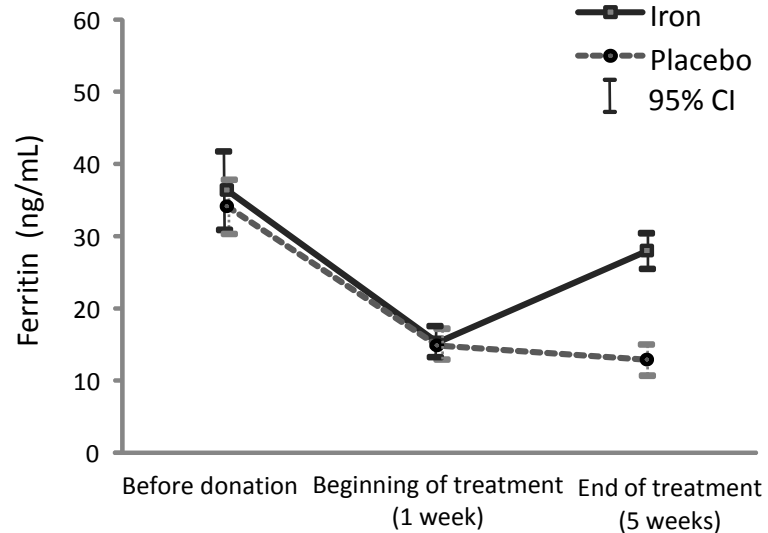

Supplement: MOESM2 [file 9598168]
